# Supplementary material
Source: HighWire-hosted journal article supplement (https://cmajopen-stage.highwire.org/highwire/filestream/90357/field_highwire_adjunct_files/0/open-2022-0198-1-at.pdf)
Supplement: open-2022-0198-1-at.pdf [file open-2022-0198-1-at.pdf]

## APPENDIX 1

Sensitivity-maximizing and specificity-maximizing search strategies for pragmatic trials for Ovid MEDLINE

| #  | Search statement                                                                                                                                                                                                                                                                                                                                                                                                                                                                                                                                                                                |
|----|-------------------------------------------------------------------------------------------------------------------------------------------------------------------------------------------------------------------------------------------------------------------------------------------------------------------------------------------------------------------------------------------------------------------------------------------------------------------------------------------------------------------------------------------------------------------------------------------------|
|    | Trial design terms                                                                                                                                                                                                                                                                                                                                                                                                                                                                                                                                                                              |
| 1  | ((pragmatic\$ OR naturalistic OR real world OR real life OR unblinded OR unmasked OR cluster OR step\$ wedge\$ OR point of care OR factorial OR switchback OR switch back OR phase 4 OR phase IV) adj10 (study OR trial)) OR (practical trial OR effectiveness trial OR ((cluster\$ or communit\$) adj2 randomi\$)).tw.                                                                                                                                                                                                                                                                         |
|    | Trial attribute terms                                                                                                                                                                                                                                                                                                                                                                                                                                                                                                                                                                           |
| 2  | (general practice\$ OR primary care OR registry based OR health record\$ OR medical record\$ OR EHR OR EMR OR administrative data OR routinely collected data OR (communit\$ adj2 intervention\$) OR quality improvement OR implementation OR decision support OR health service\$ OR health system\$ OR comparative effectiveness OR CER OR usual care OR evidence based OR practice guideline\$ OR (guideline\$ adj1 recommend\$) OR knowledge translation OR health technology assessment OR HTA OR cost effectiveness OR process evaluation OR economic evaluation OR patient oriented).tw. |
|    | Limit to records likely to be RCTs                                                                                                                                                                                                                                                                                                                                                                                                                                                                                                                                                              |
| 3  | randomized controlled trial.pt. OR ((comparative effectiveness OR randomi?ed) adj10 (trial OR study)).ti.                                                                                                                                                                                                                                                                                                                                                                                                                                                                                       |
| 4  | (comment on OR phase 1 OR phase I OR phase 2 OR phase II OR non-randomi?ed OR quasi-randomi?ed OR pseudo-randomi?ed).ti. OR (clinical trial, phase I OR clinical trial, phase II OR systematic review OR meta-analysis OR review OR editorial).pt.                                                                                                                                                                                                                                                                                                                                              |
|    | Include records tagged as pragmatic trials                                                                                                                                                                                                                                                                                                                                                                                                                                                                                                                                                      |
| 5  | pragmatic clinical trial.pt.                                                                                                                                                                                                                                                                                                                                                                                                                                                                                                                                                                    |
|    | Sensitivity-maximizing search (combines trial design terms or attribute terms with RCT terms)                                                                                                                                                                                                                                                                                                                                                                                                                                                                                                   |
| 6  | ((1 OR 2) AND (3 NOT 4)) OR 5                                                                                                                                                                                                                                                                                                                                                                                                                                                                                                                                                                   |
| 7  | exp Animals/NOT Humans/                                                                                                                                                                                                                                                                                                                                                                                                                                                                                                                                                                         |
| 8  | 6 NOT 7                                                                                                                                                                                                                                                                                                                                                                                                                                                                                                                                                                                         |
|    | Specificity-maximizing search (combines trial design terms with RCT terms)                                                                                                                                                                                                                                                                                                                                                                                                                                                                                                                      |
| 9  | ((1 AND 3) NOT 4) OR 5                                                                                                                                                                                                                                                                                                                                                                                                                                                                                                                                                                          |
| 10 | exp Animals/NOT Humans/                                                                                                                                                                                                                                                                                                                                                                                                                                                                                                                                                                         |
| 11 | 9 NOT 10                                                                                                                                                                                                                                                                                                                                                                                                                                                                                                                                                                                        |
|    | <i>Abbreviations:</i> RCT, randomized controlled trial.                                                                                                                                                                                                                                                                                                                                                                                                                                                                                                                                         |
